# Supplementary material for: Bile acid effects are mediated by ATP release and purinergic signalling in exocrine pancreatic cells
Source: PubMed Central journal article supplement (PMC4459444; doi:10.1186/s12964-015-0107-9), 2015-06-09
Supplement: 12964_2015_107_MOESM1_ESM.pdf [file 12964_2015_107_MOESM1_ESM.pdf]

## Additional figures

**Figure S1 Effect of GPBAR-A on intracellular  $\text{Ca}^{2+}$  response from Capan-1 cells**

**A**

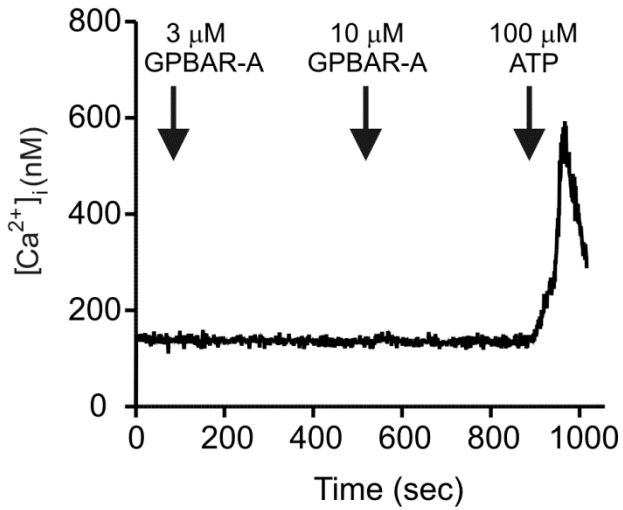

Figure S1 (A) Representative recording of  $[\text{Ca}^{2+}]_i$  transient in Capan-1 cells after stimulation with GPBAR-A (3 and 10  $\mu\text{M}$ ;  $n = 3$ ) in non - perfused conditions. Addition of GPBAR-A did not increase  $[\text{Ca}^{2+}]_i$  response in contrast to control ATP (100  $\mu\text{M}$ ).

**Figure S2 Effect of (A) CDCA and (B) ATP release inhibitors on standard curves**

**A**

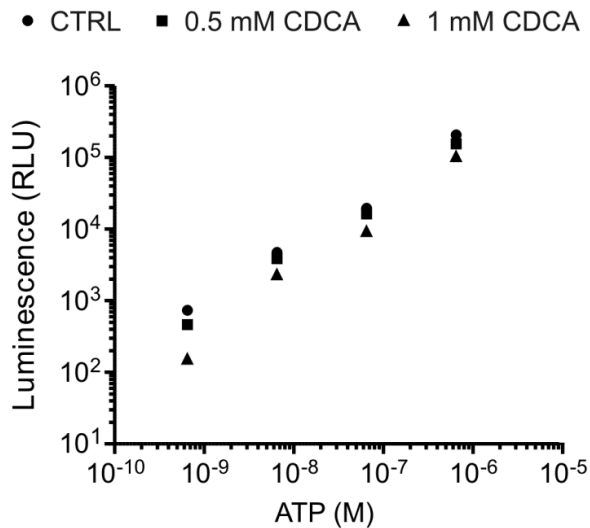

**B**

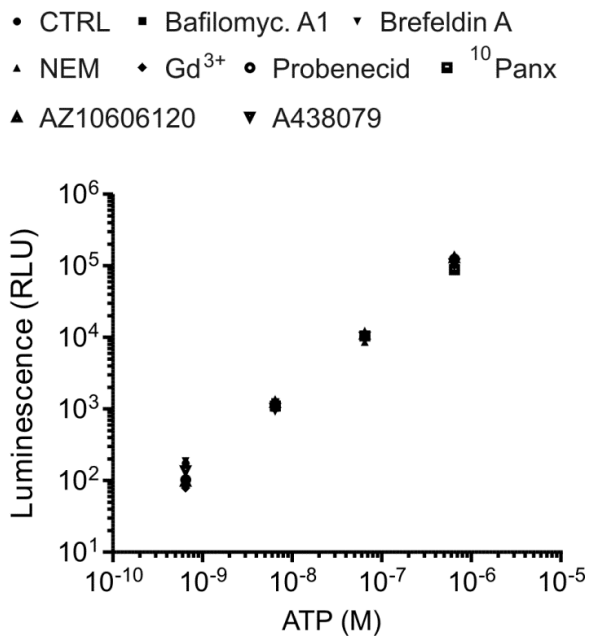

**A.** Standard curve showing the effect of 0.5 and 1 mM CDCA on luciferin/luciferase activity. **B.** Standard curve presenting the effect of ATP release inhibitors: Bafilomycin A1 (1  $\mu$ M), Brefeldin A (5  $\mu$ g/ml), NEM (N-Ethylmaleimide, 250  $\mu$ M), Gd<sup>3+</sup> (Gadolinium chloride, 50  $\mu$ M), probenecid (500  $\mu$ M), pannexin mimetic peptide (100  $\mu$ M) and P2X7 receptor inhibitors AZ10606120 (10  $\mu$ M), A438079 (10  $\mu$ M).
